# Supplementary material for: Self-crosslinkable and modifiable polysiloxanes possessing Meldrum's acid groups
Source: Royal Society of Chemistry journal article supplement (doi:10.1039/c8py01173g), 2018-01-01
Supplement: c8py01173g1.pdf [file c8py01173g1.pdf]

## Electronic supplementary information (ESI)

### Self-crosslinkable and modifiable polysiloxanes possessing Meldrum's acid groups

Wei-Lun Su and Ying-Ling Liu\*

Department of Chemical Engineering, National Tsing Hua University

#101, Sec. 2, Kuang-Fu Road, Hsinchu 30013, Taiwan

E-mail: liuyl@mx.nthu.edu.tw

#### Spectral characterization of MA-functionalized PDMS (MA-PDMS-8)

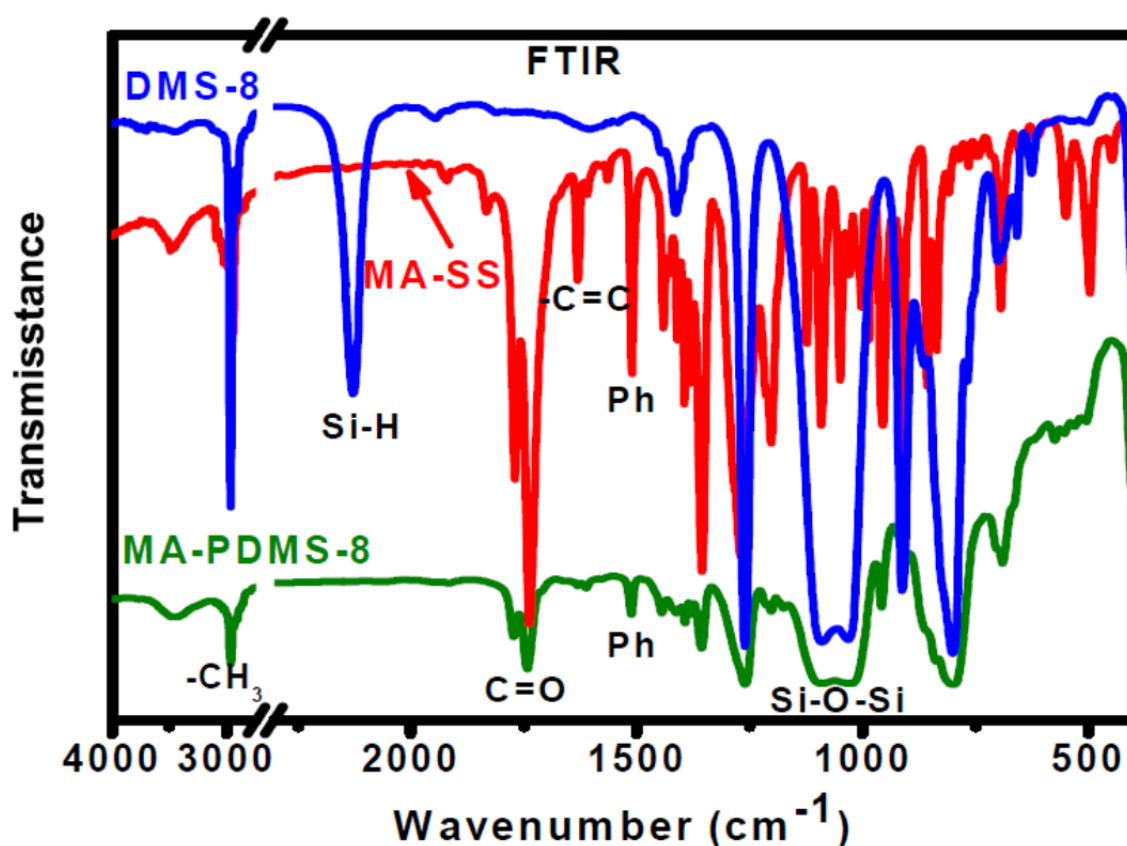

**Figure S1.** FTIR spectra of MA-PDMS-8 and its precursors (DMS-8 and MA-SS) tracing the reaction between DMS-8 and MA-SS and characterizing the chemical structure of MA-PDMS-8

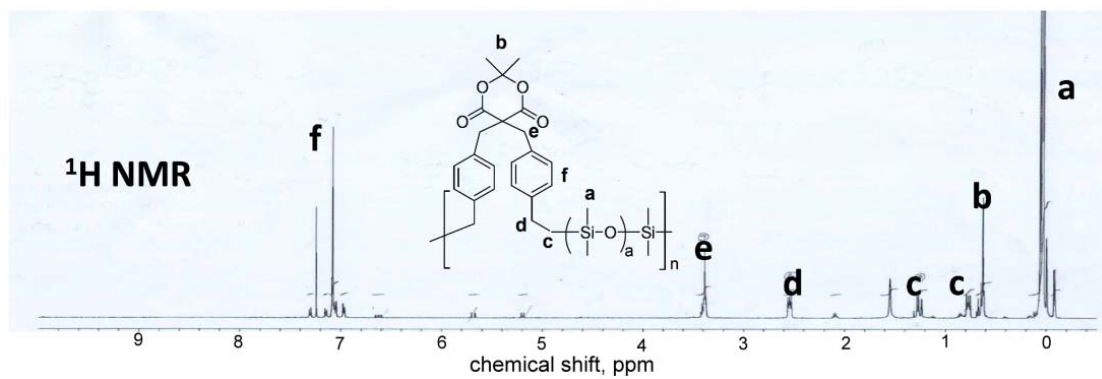

Figure S2. <sup>1</sup>H NMR spectrum of MA-PDMS-8.

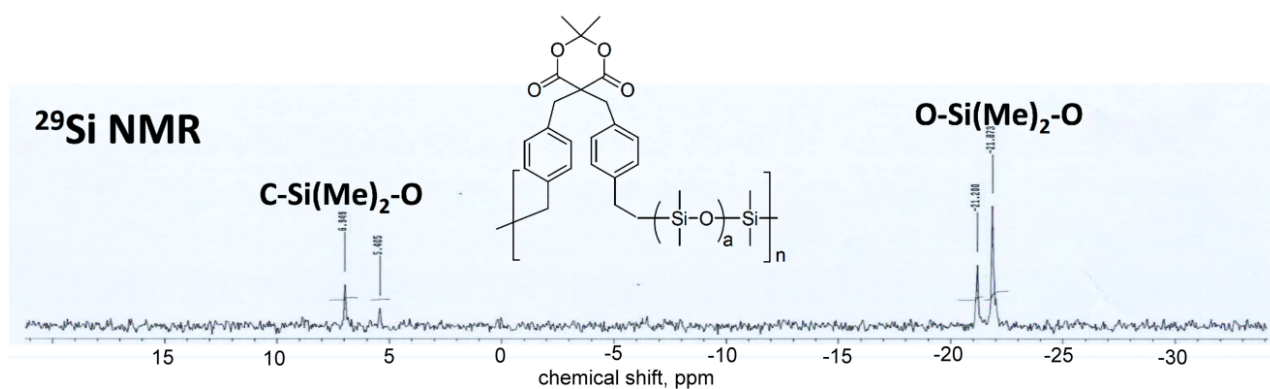

Figure S3. <sup>29</sup>Si NMR spectrum of MA-PDMS-8.

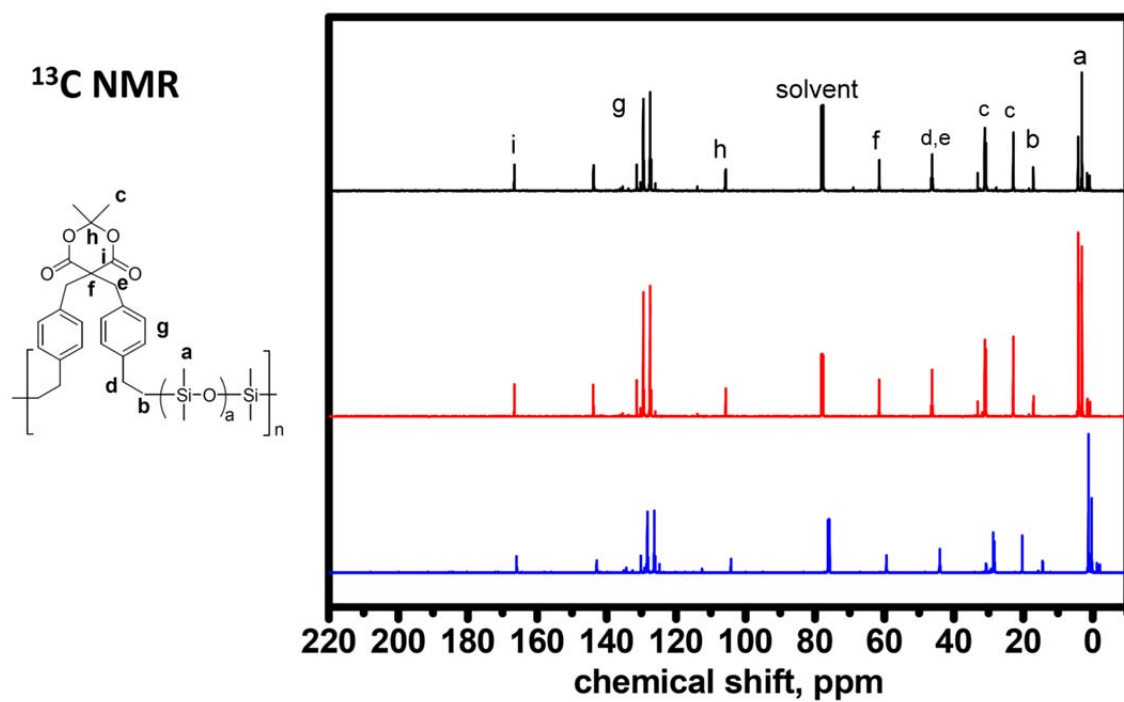

Figure S4. <sup>13</sup>C NMR spectra of MA-PDMS-X samples.

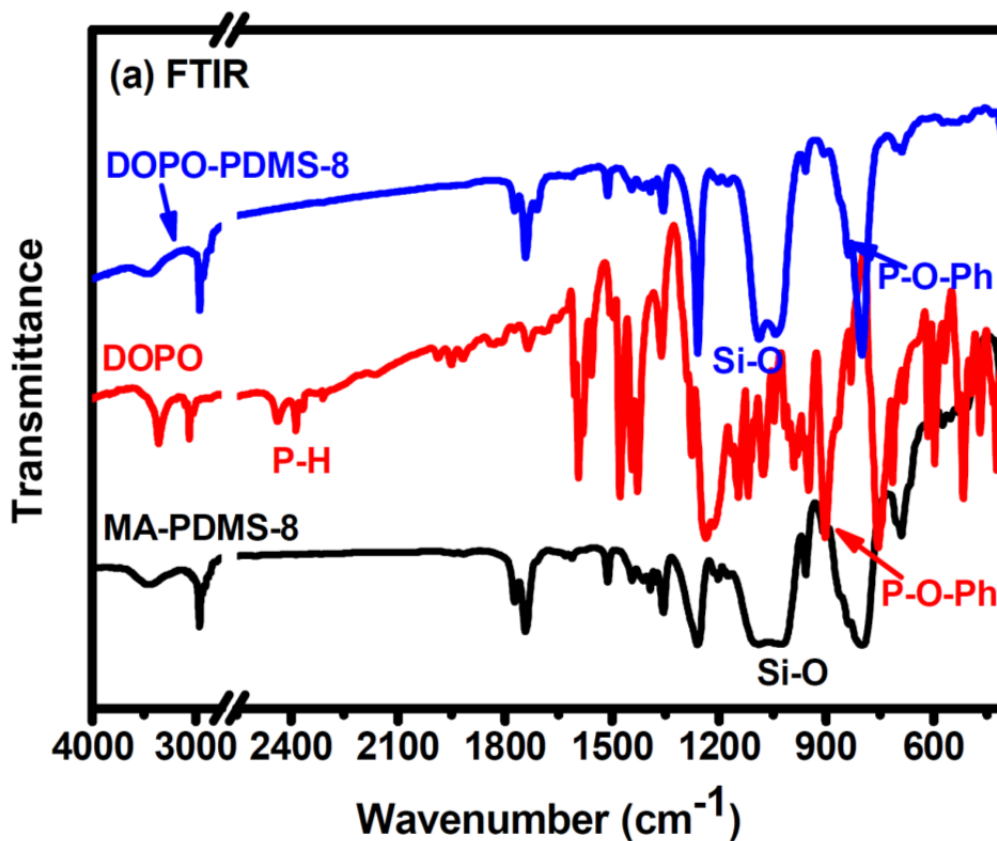

**Figure S5.** FTIR spectra of DOPO-PDMS-8 and its precursors (MA-PDMS-8 and DOPO) tracing the reaction between MA-PDMS-8 and DOPO and characterizing the chemical structure of DOPO-PDMS-8

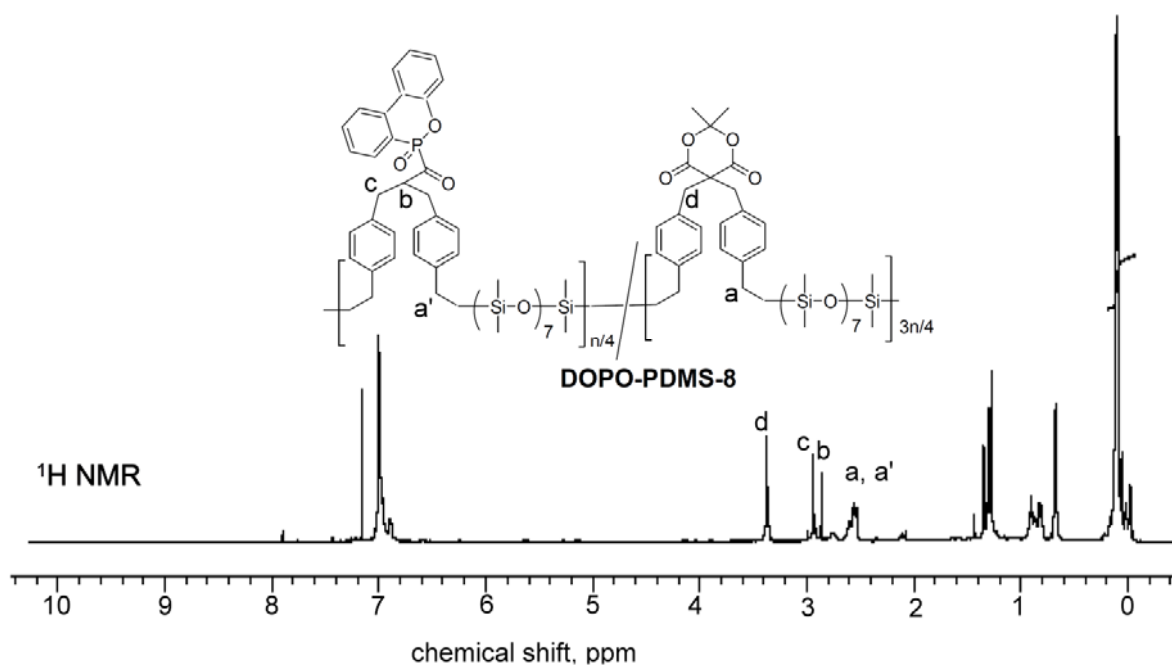

**Figure S6.**  $^1\text{H}$  NMR spectrum of DOPO-PDMS-8.

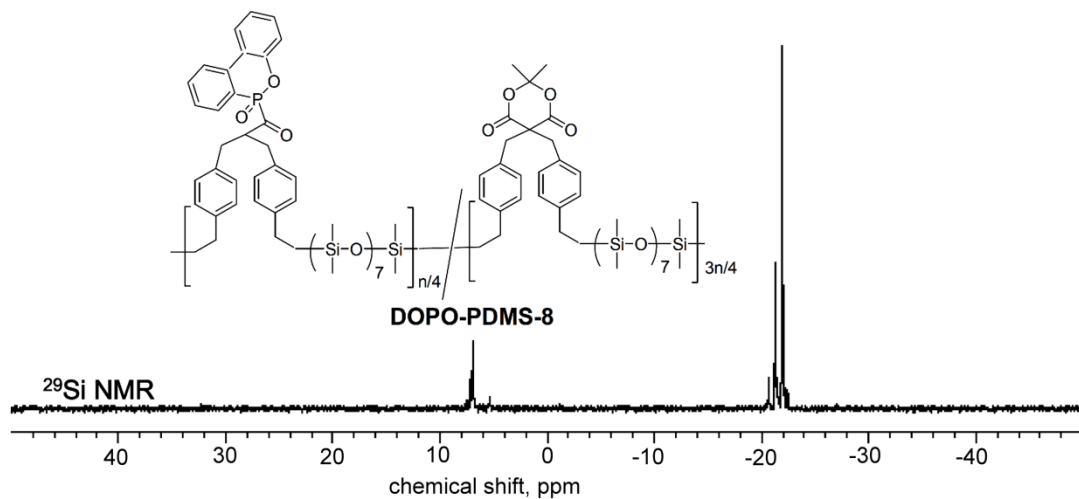

Figure S7. <sup>29</sup>Si NMR spectrum of DOPO-PDMS-8.

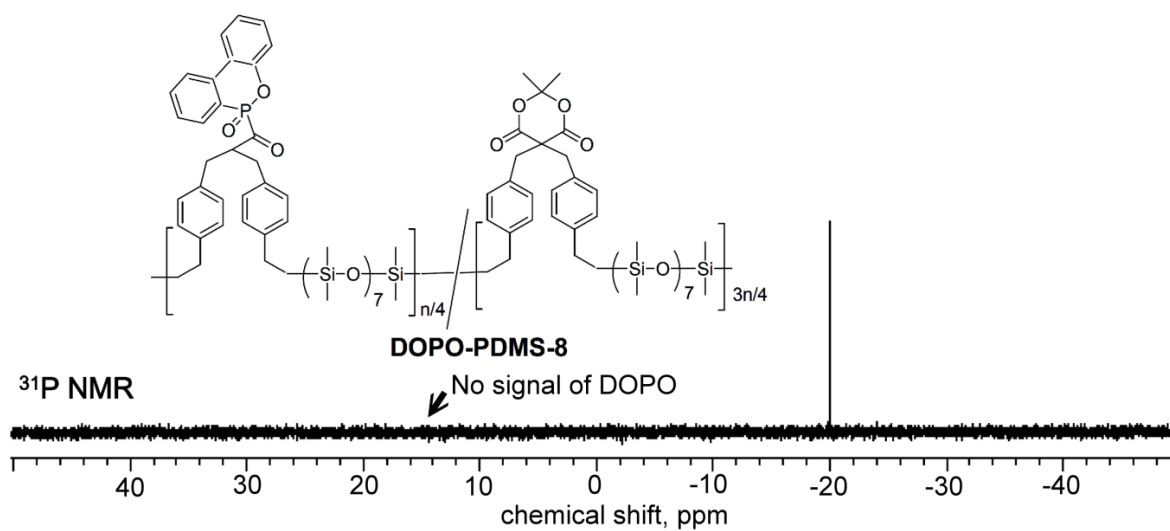

Figure S8. <sup>31</sup>P NMR spectrum of DOPO-PDMS-8.
